# Supplementary material for: Persistent, Asymptomatic Colonization with Candida is Associated with Elevated Frequencies of Highly Activated Cervical Th17-Like Cells and Related Cytokines in the Reproductive Tract of South African Adolescents
Source: PubMed Central journal article supplement (PMC9045181; doi:10.1128/spectrum.01626-21), 2022-03-29
Supplement: spectrum01626-21_supp_1_seq11.pdf [file spectrum01626-21_supp_1_seq11.pdf]

**Supplementary Figure 1. Gating strategy.** Cervical cells were obtained from Digene cytobrushes.

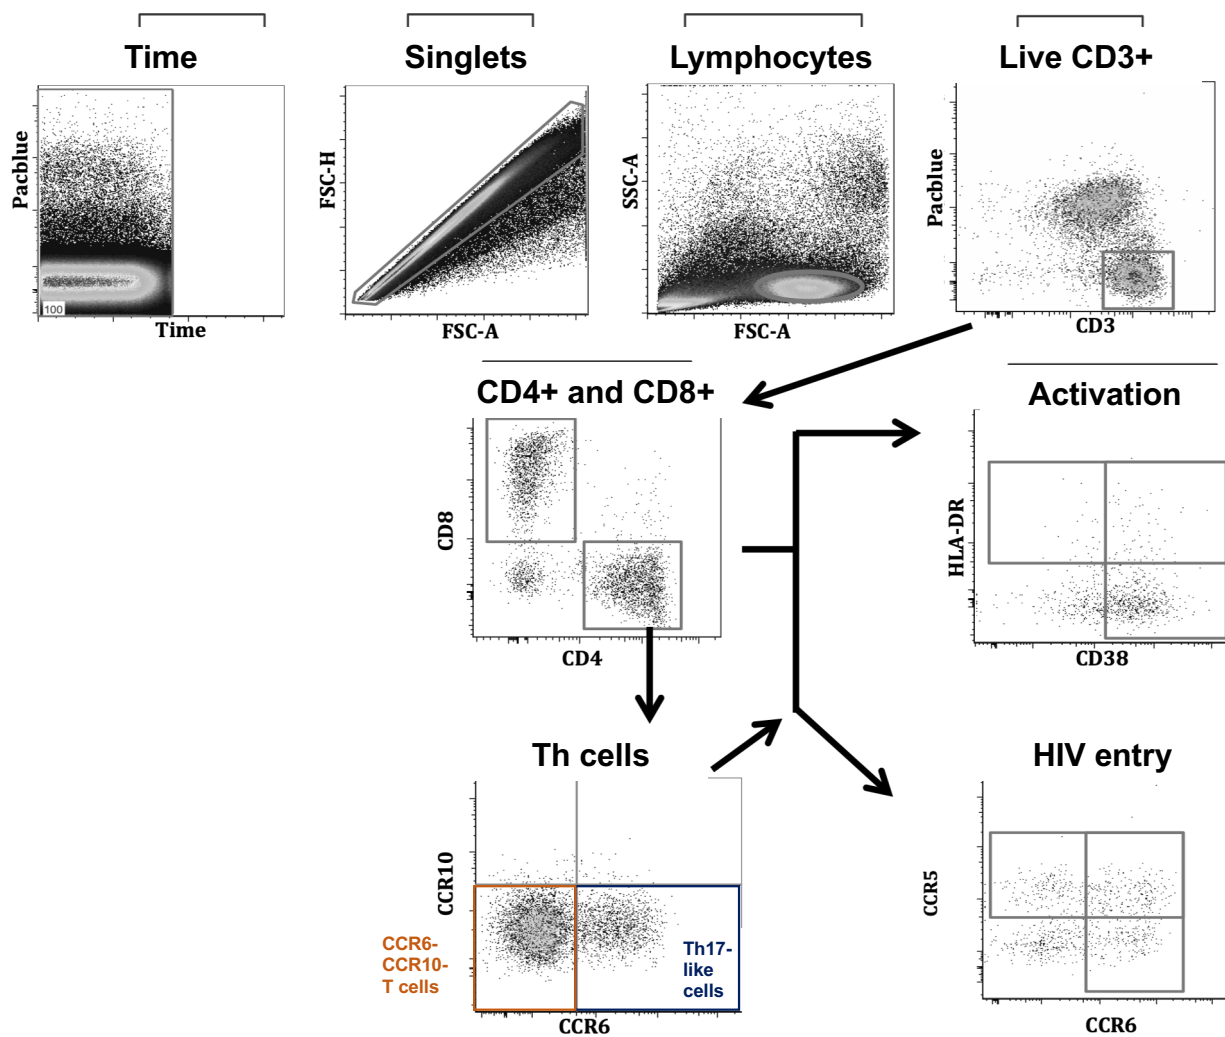

**Supplementary Table 1. Cervical cell frequencies at baseline by *Candida* colonisation and VVC status**

| Median [IQR] %                                        | None<br>n=35             | Positive<br>n=52         | p            | VVC<br>n=12             | None<br>n=75            | p            |
|-------------------------------------------------------|--------------------------|--------------------------|--------------|-------------------------|-------------------------|--------------|
| <b>CD4+ T cells</b>                                   | 45.50<br>[32.00, 52.75]  | 51.35<br>[38.17, 61.70]  | 0.097        | 52.60 [44.80,<br>56.90] | 48.55 [33.27,<br>58.73] | 0.552        |
| CCR5+                                                 | 53.20<br>[41.55, 71.10]  | 58.20<br>[42.25, 70.90]  | 0.497        | 45.00 [37.50,<br>58.70] | 58.35 [44.55,<br>71.73] | 0.153        |
| CCR5+CD38+                                            | 35.80<br>[21.75, 49.45]  | 30.20<br>[21.60, 42.60]  | 0.531        | 27.90 [18.65,<br>39.25] | 35.25 [21.90,<br>46.52] | 0.233        |
| CCR5+HLA-DR+                                          | 17.70<br>[7.92, 29.45]   | 16.70<br>[8.36, 23.10]   | 0.673        | 13.40 [8.30,<br>17.10]  | 18.20 [8.12,<br>28.72]  | 0.208        |
| CCR5+ HLA-DR+ CD38+                                   | 11.05<br>[6.60, 24.05]   | 11.35<br>[5.49, 15.70]   | 0.435        | 10.70 [5.42,<br>13.00]  | 11.70 [5.56,<br>18.65]  | 0.333        |
| CD38+                                                 | 70.55<br>[48.70, 78.62]  | 59.60 [50.40,<br>73.85]  | 0.497        | 63.60 [54.35,<br>74.95] | 61.95 [48.02,<br>77.10] | 0.822        |
| CD38+ HLA-DR+                                         | 26.60<br>[13.57, 42.22]  | 20.50 [12.17,<br>31.53]  | 0.187        | 17.70 [15.25,<br>23.23] | 23.80 [12.12,<br>37.70] | 0.283        |
| HLA-DR+                                               | 43.75<br>[24.10, 57.78]  | 32.40 [19.45,<br>41.85]  | <b>0.018</b> | 31.40 [21.20,<br>34.05] | 38.65 [21.95,<br>51.47] | 0.114        |
| <b>CCR6+CCR10- CD4+ T cells<br/>Th17-like:</b>        | 60.65<br>[47.90, 66.90]  | 49.70<br>[40.90, 61.90]  | 0.057        | 53.50 [45.72,<br>65.20] | 55.10 [42.30,<br>65.25] | 0.701        |
| CCR5+                                                 | 65.55<br>[58.52, 77.65]  | 68.00<br>[54.75, 75.90]  | 0.916        | 61.85 [47.97,<br>65.28] | 68.60 [56.90,<br>77.05] | 0.198        |
| CCR5+CD38+                                            | 42.00<br>[32.55, 52.75]  | 38.20<br>[25.35, 48.10]  | 0.420        | 41.80 [21.85,<br>46.30] | 38.60 [29.40,<br>51.10] | 0.552        |
| CCR5+ HLA-DR +                                        | 27.95<br>[15.23, 36.23]  | 19.10<br>[11.10, 25.30]  | 0.061        | 17.50 [12.97,<br>20.38] | 21.40 [11.70,<br>32.80] | 0.140        |
| CCR5+ HLA-DR +CD38+                                   | 17.75<br>[8.76, 28.57]   | 13.70<br>[6.41, 16.60]   | 0.097        | 13.35 [6.97,<br>13.70]  | 14.80 [6.86,<br>25.80]  | 0.113        |
| CD38+                                                 | 64.25<br>[50.60, 80.98]  | 55.20<br>[47.00, 68.50]  | 0.109        | 53.15 [50.38,<br>72.67] | 57.20 [44.75,<br>76.60] | 0.898        |
| CD38+ HLA-DR +                                        | 25.30<br>[12.03, 44.03]  | 19.90<br>[10.16, 28.00]  | 0.126        | 18.95 [14.72,<br>22.05] | 21.50 [11.10,<br>36.70] | 0.357        |
| HLA-DR+                                               | 47.25<br>[23.12, 52.15]  | 30.10<br>[16.58, 42.78]  | <b>0.029</b> | 30.05 [22.55,<br>33.90] | 36.25 [18.03,<br>50.65] | 0.188        |
| <b>CCR6-CCR10- CD4+ T cells<br/>Th1/Th2-enriched:</b> | 36.50<br>[30.75, 48.00]  | 44.70<br>[34.95, 53.67]  | <b>0.041</b> | 43.60 [36.50,<br>53.30] | 41.35 [32.85,<br>51.50] | 0.581        |
| CCR5+                                                 | 53.40 [<br>42.20, 69.60] | 56.20<br>[42.30, 69.20]  | 0.781        | 42.30 [32.80,<br>64.80] | 56.80 [43.40,<br>71.40] | 0.170        |
| CCR5+CD38+                                            | 35.90<br>[22.30, 42.50]  | 26.20<br>[20.00, 44.30]  | 0.663        | 25.50 [19.80,<br>35.90] | 31.40 [21.70,<br>44.30] | 0.228        |
| CCR5+ HLA-DR +                                        | 20.00<br>[10.80, 30.10]  | 14.10<br>[8.79, 21.40]   | <b>0.047</b> | 10.80 [6.94,<br>14.10]  | 17.90 [10.00,<br>27.30] | 0.079        |
| CCR5+ HLA-DR +CD38+                                   | 13.80<br>[7.69, 22.30]   | 9.56<br>[4.92, 13.70]    | 0.107        | 8.07 [5.49,<br>12.30]   | 10.00 [5.45,<br>20.20]  | 0.266        |
| CD38+                                                 | 64.10<br>[50.50, 76.20]  | 64.30 [<br>53.10, 76.00] | 0.756        | 63.70 [58.10,<br>74.90] | 64.40 [50.50,<br>76.20] | 0.852        |
| CD38+ HLA-DR+                                         | 20.95<br>[10.45, 35.10]  | 16.40<br>[8.36, 31.08]   | 0.292        | 14.15 [6.30,<br>18.93]  | 18.35 [10.03,<br>35.10] | 0.105        |
| HLA-DR+                                               | 40.90<br>[23.00, 61.00]  | 25.80<br>[15.70, 42.90]  | <b>0.049</b> | 18.70 [13.90,<br>33.20] | 38.50 [21.40,<br>51.40] | <b>0.024</b> |

**Supplementary Table 2. Significant fold change differences in vaginal bacterial abundance in women with *Candida* colonisation or VVC compared to those without.**

| <b>Bacterial taxa</b>            | <b>Condition</b> | <b>log2FoldChange</b> | <b>Standard error</b> | <b>p value*</b> |
|----------------------------------|------------------|-----------------------|-----------------------|-----------------|
| <i>Prevotella intermedia</i>     | Colonisation     | -4.045                | 0.917                 | 2.13E-03        |
| <i>Fusobacterium nucleatum</i>   | Colonisation     | -2.485                | 0.593                 | 2.93E-03        |
| <i>Porphyromonas eunonis</i>     | VVC              | -4.048                | 0.636                 | 3.8E-08         |
| <i>Prevotella timonensis</i>     | VVC              | -3.339                | 0.555                 | 1.7E-07         |
| <i>Mobiluncus mulieris</i>       | VVC              | -4.034                | 0.748                 | 4.4E-06         |
| <i>Prevotella</i>                | VVC              | -4.898                | 0.918                 | 4.6E-06         |
| <i>Fusobacterium nucleatum</i>   | VVC              | -3.782                | 0.741                 | 1.3E-05         |
| <i>Megasphaera</i>               | VVC              | -6.517                | 1.328                 | 3.0E-05         |
| <i>Prevotella</i>                | VVC              | -3.542                | 0.731                 | 3.4E-05         |
| <i>Gardnerella</i>               | VVC              | -5.453                | 1.151                 | 4.6E-05         |
| <i>Fusobacterium equinum</i>     | VVC              | -5.399                | 1.139                 | 4.6E-05         |
| <i>Campylobacter ureolyticus</i> | VVC              | -2.947                | 0.634                 | 6.4E-05         |
| <i>Porphyromonadaceae</i>        | VVC              | -3.718                | 0.876                 | 3.9E-04         |
| <i>Moryella</i>                  | VVC              | -3.851                | 0.964                 | 1.0E-03         |
| <i>Prevotella melaninogenica</i> | VVC              | -3.9890               | 1.013                 | 1.1E-03         |
| <i>Prevotella NA</i>             | VVC              | -4.287                | 1.086                 | 1.1E-03         |
| <i>Porphyromonas somerae</i>     | VVC              | -3.427                | 0.898                 | 1.8E-03         |
| <i>Prevotella NA</i>             | VVC              | -3.873                | 1.117                 | 5.3E-03         |
| <i>Porphyromonas NA</i>          | VVC              | -3.462                | 1.005                 | 5.5E-03         |
| <i>Prevotella bivia</i>          | VVC              | -2.270                | 0.668                 | 6.2E-03         |
| <i>Peptococcus niger</i>         | VVC              | -2.646                | 0.782                 | 6.3E-03         |
| <i>Mogibacteriaceae</i>          | VVC              | -3.593                | 1.069                 | 6.5E-03         |
| <i>Anaerococcus lactolyticus</i> | VVC              | -2.696                | 0.805                 | 6.5E-03         |
| <i>Prevotella intermedia</i>     | VVC              | -3.616                | 1.107                 | 8.4E-03         |
| <i>Gardnerella vaginalis</i>     | VVC              | -2.788                | 0.864                 | 8.9E-03         |
| <i>Bacteroidales</i>             | VVC              | -3.4977               | 1.087                 | 8.9E-03         |
| <i>Campylobacter</i>             | VVC              | -3.775                | 1.167                 | 8.9E-03         |
| <i>Porphyromonas</i>             | VVC              | -3.590                | 1.122                 | 9.2E-03         |
| <i>Porphyromonas eunonis</i>     | VVC              | -4.048                | 0.636                 | 3.8E-08         |
| <i>Prevotella timonensis</i>     | VVC              | -3.339                | 0.555                 | 1.7E-07         |
| <i>Mobiluncus mulieris</i>       | VVC              | -4.034                | 0.748                 | 4.4E-06         |
| <i>Prevotella</i>                | VVC              | -4.898                | 0.918                 | 4.6E-06         |
| <i>Fusobacterium nucleatum</i>   | VVC              | -3.783                | 0.740                 | 1.3E-05         |
| <i>Megasphaera</i>               | VVC              | -6.517                | 1.328                 | 3.0E-05         |
| <i>Prevotella</i>                | VVC              | -3.545                | 0.731                 | 3.4E-05         |
| <i>Gardnerella</i>               | VVC              | -5.453                | 1.150                 | 4.6E-05         |
| <i>Fusobacterium equinum</i>     | VVC              | -5.399                | 1.139                 | 4.6E-05         |
| <i>Campylobacter ureolyticus</i> | VVC              | -2.947                | 0.634                 | 6.4E-05         |

\* p values based on a Wald test using parameters estimated by maximum likelihood, and adjusted for multiple comparisons using the FDR/Benjamini-Hochberg method
